# Supplementary figures and images for: Six-year trajectories of post-traumatic stress and severe psychological distress symptoms and associations with timing of trauma exposure, ongoing adversity and sense of injustice: a latent transition analysis of a community cohort in conflict-affected Timor-Leste
Source: PubMed Central journal article supplement — BMJ Open. 2016 Feb 23;6(2):e010205. doi: 10.1136/bmjopen-2015-010205 (PMC4769389; doi:10.1136/bmjopen-2015-010205), 2016-02-23

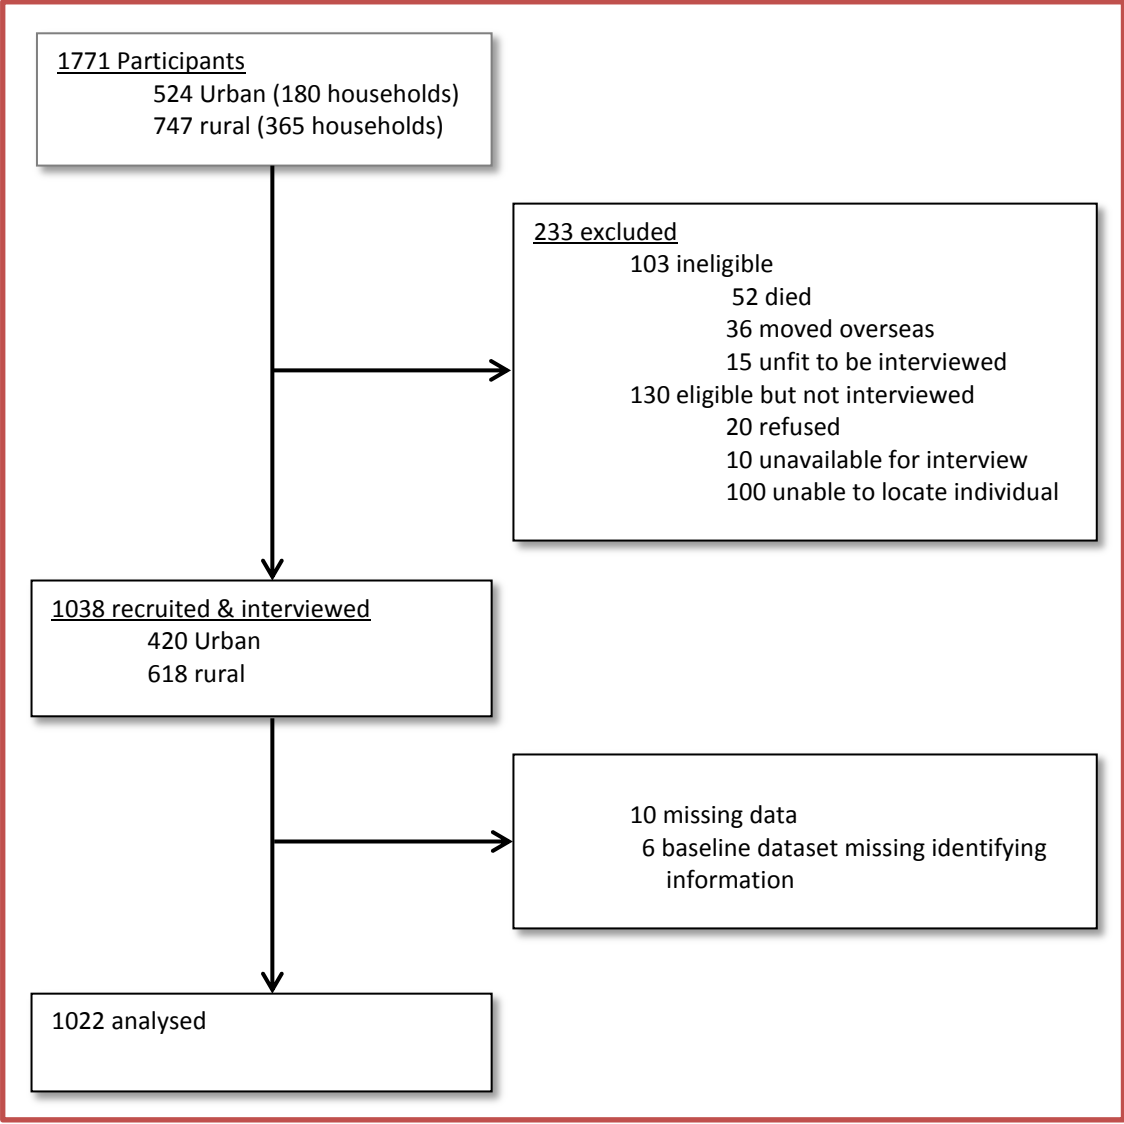

Supplement: bmjopen-2015-010205supp.pdf [file bmjopen-2015-010205supp.pdf]
